# Supplementary material for: Unexpected selection to retain high GC content and splicing enhancers within exons of multiexonic lncRNA loci
Source: PubMed Central journal article supplement (PMC4338330; doi:10.1261/rna.047324.114), 2015-03

**Supplementary Figure 1:** Comparison of GC content between lncRNAs predicted to encode smORFs (< 100 aa, Bazzini et al. 2014) and the remaining lncRNAs in human. ns: not significant; \*: P<0.05.

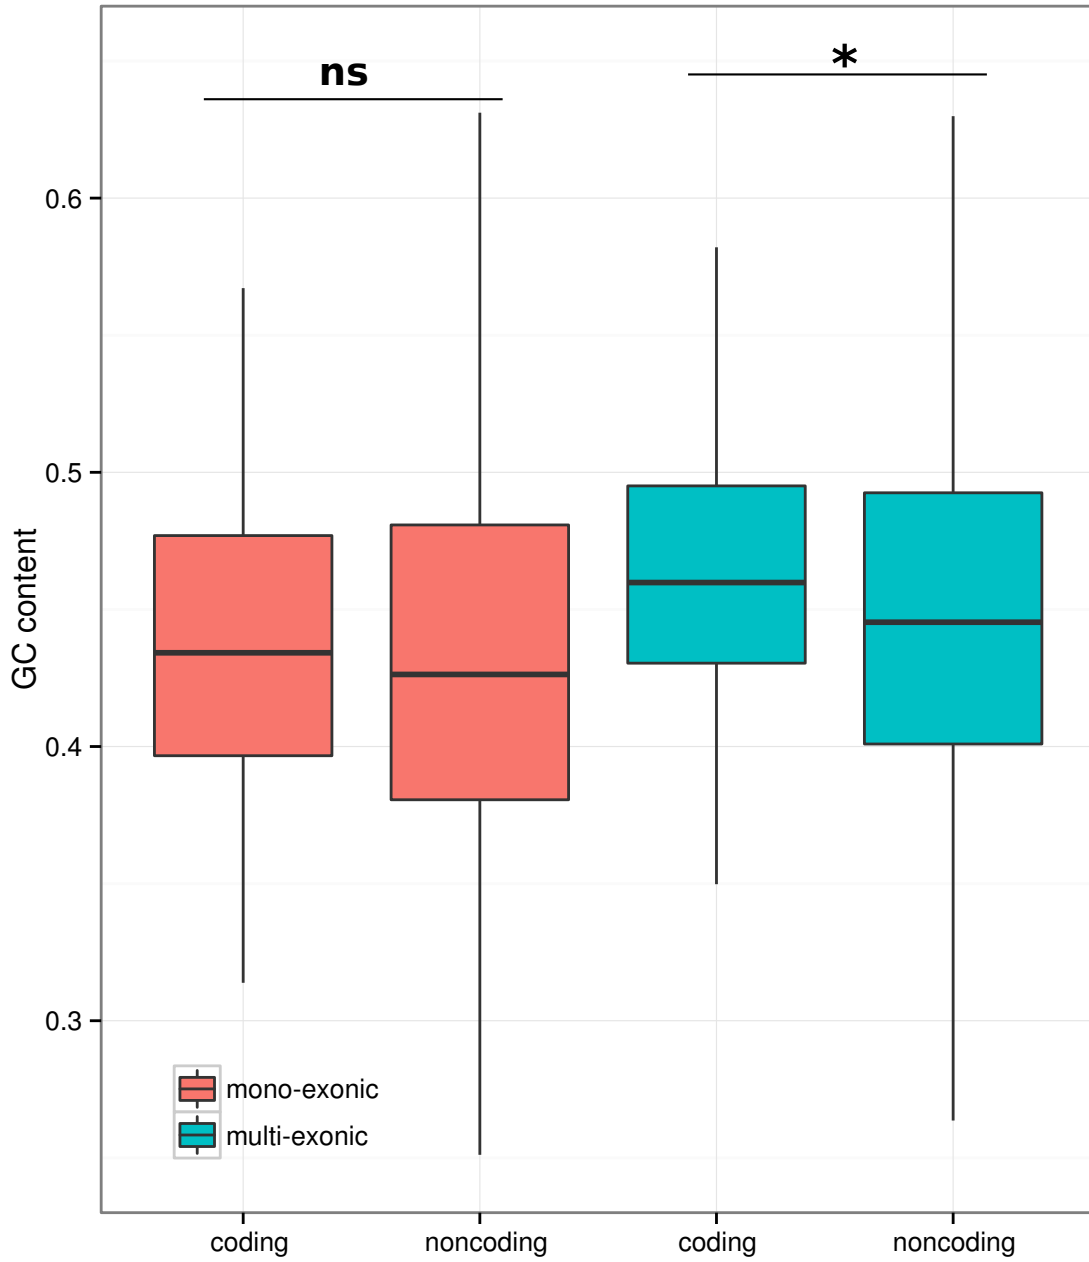

Supplement: supp_047324.114_Supplementary_figure_1.pdf [file supp_047324.114_Supplementary_figure_1.pdf]
