# Supplementary material for: Unexpected selection to retain high GC content and splicing enhancers within exons of multiexonic lncRNA loci
Source: PubMed Central journal article supplement (PMC4338330; doi:10.1261/rna.047324.114), 2015-03

**Supplementary Figure 2.** GC content variation between lncRNAs exons depending upon gene model (mono-exonic, multi-exonic) and the presence of enhancers and TFBSs within the loci.

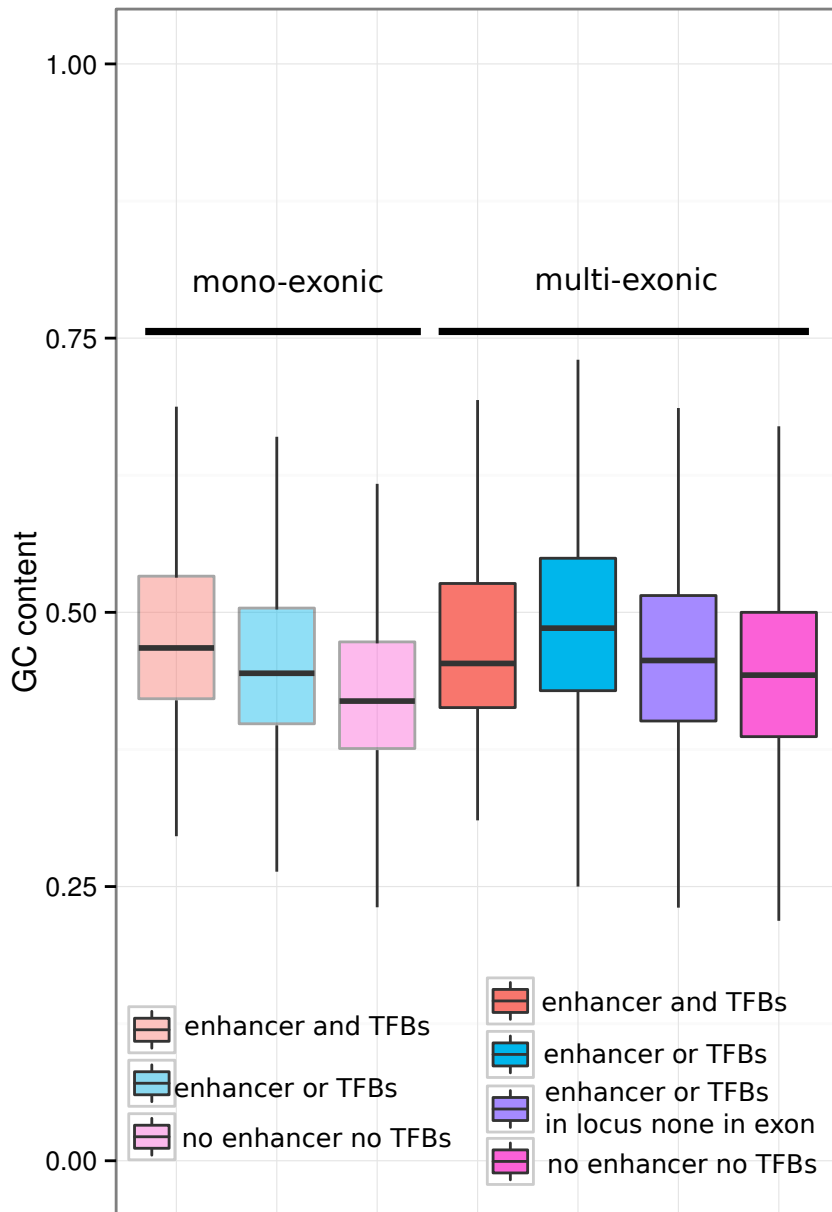

Supplement: supp_047324.114_Supplementary_figure_2.pdf [file supp_047324.114_Supplementary_figure_2.pdf]
