# Supplementary material for: Unexpected selection to retain high GC content and splicing enhancers within exons of multiexonic lncRNA loci
Source: PubMed Central journal article supplement (PMC4338330; doi:10.1261/rna.047324.114), 2015-03

**Supplementary figure 3:** Comparison of GC content between exons with and without TFBSs within the same locus

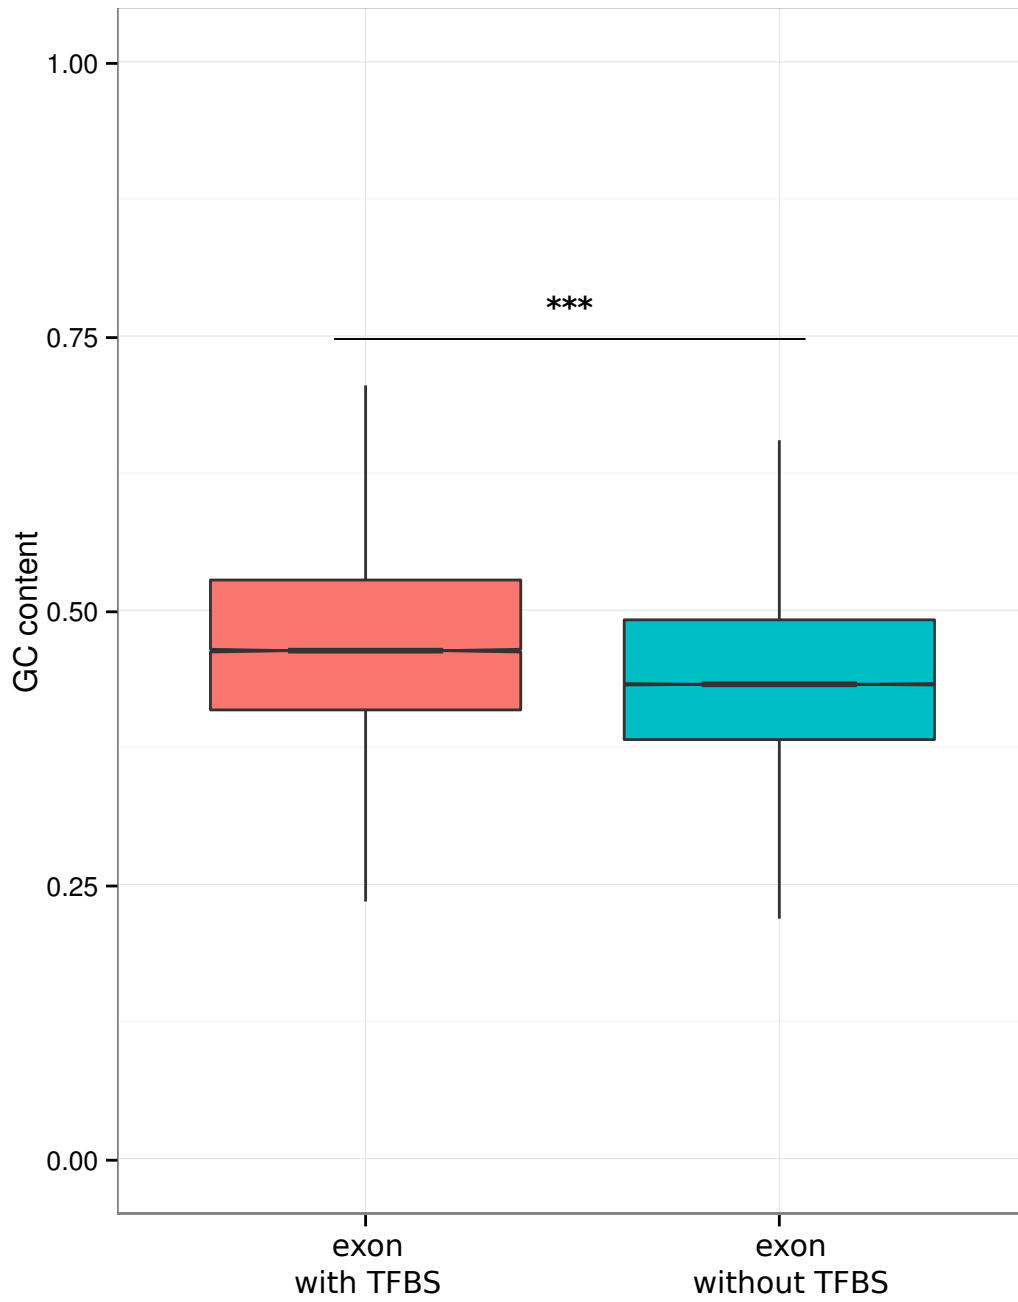

Supplement: supp_047324.114_Supplementary_figure_3.pdf [file supp_047324.114_Supplementary_figure_3.pdf]
