# Supplementary material for: Unexpected selection to retain high GC content and splicing enhancers within exons of multiexonic lncRNA loci
Source: PubMed Central journal article supplement (PMC4338330; doi:10.1261/rna.047324.114), 2015-03

**Supplementary Figure 6.** Comparison of the proportion of methylated CpG (mCpG) over the number of CpG at the 5' and 3' boundaries of intermediate protein coding (blue) and intergenic lncRNA (red) exons.

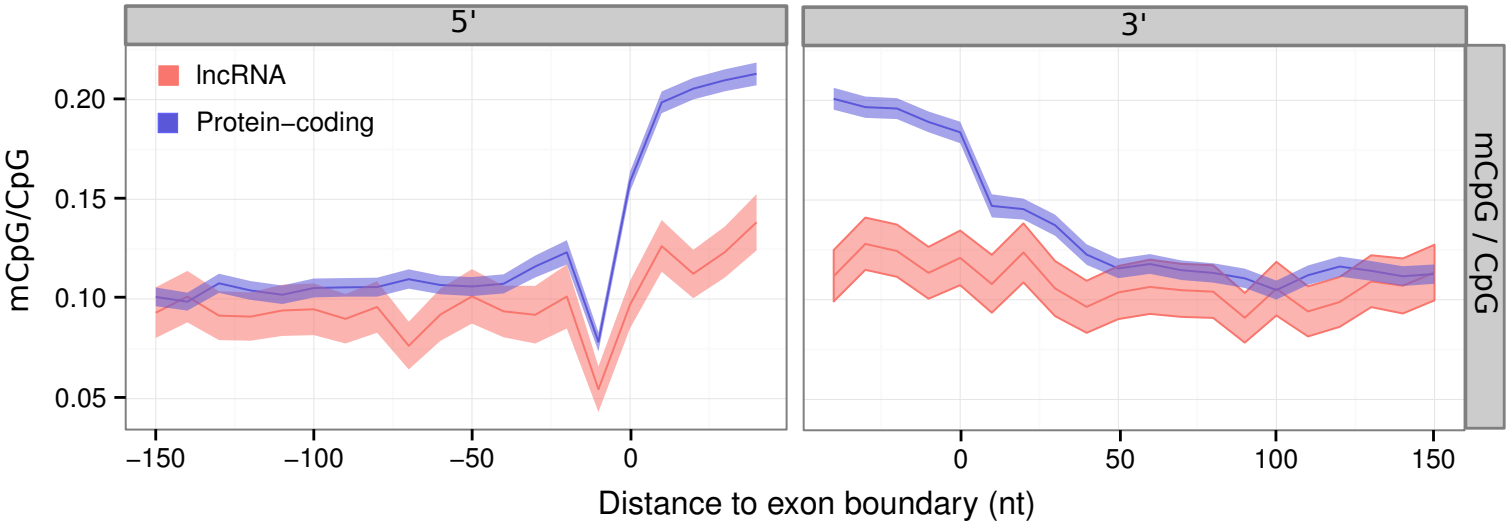

Supplement: supp_047324.114_supplementary_figure_6.pdf [file supp_047324.114_supplementary_figure_6.pdf]
